# Supplementary material
Source: publisher figshare collection journal article supplement (https://geolsoc.figshare.com/ndownloader/files/5423762)
Supplement: Supplementary file 1 [file 5423762]

,Locality,rock type,direction,N,D,I,Dc,Ic,kc/kis,a95%,Lat,Lon,Lat-rot,Lon-rot,Ref.1,datation proc.,age Ma,Ref.2,,,,
,Maures-Estérel,,,,,,,,,,,,,,,,,,,,,
MP1,Permian basins,pelites,,10,206,-31,196,-14,161/17,4,51,161,,,11,,260-245,,,,,
MP2,Permian basins,"tuffs, sandstones",,9,,,189,-21,,13.5,56.5,168.5,,,27,,285-260,,,,,
MB,Gonfaron Fm,sandstones,,3,,,191,-23,,14,57,166,,,27,,245,,,,,
PTr1,Plan-de-la-Tour bas.,rhyolites,,2,241,4,239,-16,13/15,,,,,,3,,305±5,10,,,,
PTr2,Plan-de-la-Tour bas.,rhyolites,,7,240,-20,255,-5,86/10 ,6,14,105,,,18,,303.6 ± 1.2 ,21,,,,
PTr3,Plan-de-la-Tour bas.,rhyolites,,5,254,-7,247,3,6/71,9,14,105,,,18,,,,,,,
PTrc,Plan-de-la-Tour bas.,rhyolites + conglom.,,3,192,2,203,-22,70/87,15,44,170,,,18,,,,,,,
Esv1,Estérel,volcanics,,12,207,-9,207,-23,52/34,6,51,142,,,3,Ar-Ar,278-264,14,,,,
Esv2,Estérel,volcanics,,8,,,206.5,-23,,5.7,51,143,,,17,Ar-Ar,278-264,14,,,,
Ess,Estérel,sédiments,,3,204,3,203,-12,543/190,5,47,150,,,3,,,,,,,
,N. Corsica,,,,,,,,,,,,,,,,,,,,,
NCU2,Scandola-Cinto,U2 ignimbrites ,AB,5,,,165,4,21,7,44,209,23,125,5,"U-Pb, zr",292.5±2.2,,,,,
,,,,,,,,,,,,,,,,"U-Pb, zr",290±2/284±4,,,,,
NCU3,Scandola-Cinto,U3 ignimbrites  ,A,5,,,180,-29,23,16,64,189,26,100,5,"U-Pb, zr",278±2,,,,,
NCd1,,dykes ,A,16,177,-20,,,,10,58,194,24,106,5,,,,,,,
NCd2,Tuara,dolerites,AB,,167,-16,,,,10,54,211,30,116,"5, 6",,,,,,,
NCg,Ota,gabbro,A,,189,-13,,,,5,54,174,13,101,"5, 6","K-Ar, Hb, Bt",282±10,9,,,,
,,,,,,,,,,,,,,,,"K-Ar, Pl",230±9,9,,,,
,,,,,,,,,,,,,,,,"LA ICP-MS, zr",281±3/ 283±2,20,,,,
,,,,,,,,,,,,,,,,"LA ICP-MS, zr",259±9,20,,,,
,,,,,,,,,,,,,,,,Rb-Sr,251±14,21,,,,
Otg,Ota,gabbro,A,1,185,-18,,,,,56.7,180,18,102,X,,,,,,,
BaGK,Balagne,mg-K granodiorites,C,5,96,6,,,,12,-2,92,-42,28,X,"U-Pb , zr",347±2,15,,,,
,,,,,,,,,,,,,,,,"Pb evapor, zr",338.8±1.9 ,,,,,
Os,Osani ,andesite,C,4,105,-9,107,13,51/42,13,-8,82,-41,13,X,"U-Pb, zr",308.1±2.9,,,,,
,,,,,,,,,,,,,,,,"K-Ar, Cl",279±9,9,,,,
BldA,Balagne,dyke + gabbro,A,2,181,-19,,,,,54,172,13,100,X,"U-Pb , zr",305±2,16,,,,
BlOA,Balagne,gr.+and. overprints,A,4,187,-13,,,58,12,53,187,18,108,X,,,,,,,
BlOB,Balagne,gr.+and. overprints,B,3,139,0,,,82,14,-34,61,-40,329,X,,,,,,,
,S. Corsica,,,,,,,,,,,,,,,,,,,,,
SCd,S. Corsica,dykes,B,11,135,-1,,,,7,36,250,48,151,13,,,,,,,
,NE. Sardinia,,,,,,,,,,,,,,,,,,,,,
Gad1,Gallura,dykes,B,11,133,-2,,,,7,31,249,45,157,13,,,,,,,
Gad2,NE Sardinia,dykes,B,12,138,-1,,,,6,34.5,244,43,150,26,,,,,,,
Gai1,Gallura,ignimbrites,B,6,142,3,142,-2,34/32,11,38,239,41,144,4,"U-Pb, zr",275.6 ±3.4,,,,,
Gai2,Gallura,ignimbrites,B,26,,,147,3,7,7,37,238,40,144,6,"U-Pb, zr",275.6 ±3.4,,,,,
,,,,,,,,,,,,,,,,"K-Ar, Fs+Q",259±10,9,,,,
IRTA,Is. Rossa-Trinita d'A.,diorite,C,4,109,13,105,5,82/20,9,-10,87,-45,16,X,"U-Pb, zr",300.1±6.1,,,,,
LE,La Ettica,quarz-diorite,D,4,,,81,-18,corr.+is,14,1,112,-48,51,X,"Ar-Ar, hb",286.5±4.3,,,,,
IRTAD,Gallura D,granod. + dyke,D,4,70,3,74,-11,95/25,9,8.2,114,-40,60,X,,,,,,,
Gad,Gallura dykes,dykes NNE-SSW,B,3,128,-3,,,,17,34,254,-47,342,X,"Ar-Ar, hb","253.8±4.9,",19,,,,
,,,,,,,,,,,,,,,, 248.4±8.8,204.7±5.3,,,,,
BbC,Barrabisa,granodiorite,C,42,111,15,105,8,22,5,-8.5,86.2,-44,16,X,"U-Pb, zr",311 ±6 ,,,,,
,,,,,,,,,,,,,,,,"LA ICP-MS, zr",320 ± 10 ,,,,,
BbD,Barrabisa,granodiorite,D,23,68,-1,72,-24,22,7,4.8,120.5,-45,68,X,,,,,,,
,,,,,,,,,,,,,,,,,,,,,,
BbAB,Barrabisa,granodiorite,AB,10,150,2,,,26,10,-40,50,-35,318,X,,,,,,,
BbB,Barrabisa,granodiorite,B,13,128,-23,,,42,6,36,260,-55,336,X,,,,,,,
,,,,,,,136,-9,42,6,36,248,-46,330,,,,,,,,
BbA,Barrabisa,granodiorite,A,17,200,-6,,,24,9,48,159,3,96,X,,,,,,,
GaOB,Gallura overprints,granodiorites,B,7,131,-13,,11,11,15,34.5,254.5,-50,336,X,"Ar-Ar, hb, bt",,,,,,
GaOAB,Gallura overprints,granodiorites,AB,2,150,-3,,10,10,10,40,230,-37,317,X,,,,,,,
GaOTJ,Gallura overprints,granod. + dykes,TJ',4,304,42,,,59,12,41,278,70,153,X,fission tracks,224±16/247±20,12,,,,
Cd,Lode,camptonite dyke,A,1,0,16,,,,,57.46,189.7,22,105,X,"Ar-Ar, hb",227±3,12,,,,
Nui,Nurra,ignimbrites,B?,2,124,24,126,-1,,,27,253,46,164,9,K-Ar: Bt,297±9,9,,,,
,,,,,,,,,,,,,,,,K-Ar: WR,207±11,2,,,,
,,,,,,,,,,,,,,,,"Ar-Ar, hb",291.5±1.5 ,,,,,
Nus,Nurra,sandstones,B?,4,128,-7,120,-12,34/14 ,13,26,262,52,172,"4, 9",Permo-Trias,,,,,,
,SE Sardinia,,,,,,,,,,,,,,,,,,,,,
SSv,Seui-Seulo,"andesites, ignimbrites",CD,4,94,9,94,-8,112/9,9,5,100,-40,41,"8, 9","K-Ar: Pl, Fs",266±7,9,,,,
,,,,,,,,,,,,,,,,K-Ar: WR,262±13,1,,,,
,,,,,,,,,,,,,,,,K-Ar: WR,224±10,1,,,,
Bai,Baunei,ignimbrites,C,3,104,3,97,-8,32/21,21,-8,98,-50,30,"8, 9","K-Ar: Pl, Fs+Q",296±11,9,,,,
,,,,,,,,,,,,,,,,K-Ar: WR,256±5,2,,,,
TVi,Talana-Villagrande,"porphyr., ignimbrites",CD,4,89,-24,86,-5,92/27,10,1,104,-45,44,"8, 9","K-Ar: Pl, Bt+Cl",311±10,9,,,,
,,,,,,,,,,,,,,,,"K-Ar: Pl, Fs+Q",266±10,9,,,,
,,,,,,,,,,,,,,,,K-Ar: WR,237±9,2,,,,
MFv,Mte Ferru-Tertenia,"andesites, ignimbrites",D,4,81,-7,78,-2,65/10 ,11,8,108,-40,52,"8, 9","K-Ar: Pl, Fs+Q",215±8/258±8,9,,,,
,,,,,,,,,,,,,,,,K-Ar: WR,227±7,2,,,,
Esv,Escalaplano,"tufs, andesites,",D,3,77,-13,76,-8,44/24 ,18,8,111,-40,56,"8, 9",K-Ar: Bt,301±8,9,,,,
,, ignimbrites,,,,,,,,,,,,,,K-Ar: Pl,266±8,9,,,,
,,,,,,,,,,,,,,,,K-Ar: WR,235±5,2,,,,
CSd,Central Sardinia,dykes,D,14,89,-3,,,,4,0,101,-45,40,26,,,,,,,
SSd,Southern Sardinia,dykes,D,6,81,-21,,,,4,0,113,-49,56,26,,,,,,,
,SW Sardinia,,,,,,,,,,,,,,,,,,,,,
Igs,Iglesiente,Ordovician sediments,,,,,,,,,,,,,,,,,,,,
Igs,Iglesiente,Ordovician sediments,C,6,100,-3,,,,13,-9,94,-49,24,28,,,,,,,
,,,D',2,243,15,,,,,,,,,,,,,,,,
,,,,,,,,,,,,,,,,,,,,,,
NuMJ,Nurra ,sediments,TJ,4,269,41,259,43,27.7/23.7,,8,304,58,253,23,Middle Jurassic,,,,,,
NuLJ,Nurra ,sediments,TJ,1,287,51,243,58,5.9/5.9,,8,324,53,287,23,Late Jurassic,,,,,,
SBMJ,Supramonte-Baron.,sediments,TJ,7,276,30,277,41,15/13.4,,20,294,68,227,23,Middle Jurassic,,,,,,
SBLJ,Supramonte-Baron.,sediments,TJ,8,269.5,35,278,49,6.7/14.1,,24,299,73,237,23,Late Jurassic,,,,,,
BSMJ,Barbagia-Sarcidano,sediments,TJ,12,273,53.5,273,50,12.3/11.6,,22,301,72,244,23,Middle Jurassic,,,,,,
SuMJ,Sulcis ,sediments,TJ,1,93,66,258,26,10/21,,0,296,49,241,23,Middle Jurassic,,,,,,
SaMTr,Sarcidano,sediments,TJ,,293,42,,,,,33,285,73,182,7,Middle Triassic,,,,,,
BaMJ,Baronie ,sediments,TJ,,303,48,,,,,43,284,75,146,7,Middle Jurassic,,,,,,
OgLJ,Ogliastra,sediments,TJ,,,,,,,,33,300,82,227,7,Late Jurassic,,,,,,
,Calabria,,,,,,,,,,,,,,,,,,,,,
,Sila,"diorites, dykes, amphib.",CD,,57,-10,,,,9.5,,,,,25,,293–289,24,,,,
,Catalonian Coastal R.,sandstones,TJ,,,,,,,,57,176,,,29,,,,,,,
,Catalonian Coastal R.,dykes,A?,,249,8,,,29,7,-13,290,,,30,"K-Ar, Bt, Fs",284±4 Ma,31,,,,
,,,,,,,,,,,,,,,,,,,,,,
,MEANS,,,N,DEC,INC,,,K,A95,LAT°N,LON °E,,,,,,,,,,
C,,,C,6,102,3,,,157,5,-8,90,,DEC/INC are computed for ,,,,,,,,
D,,,D,9,80,-10,,,115,5,4,109,,the locality 41°N/9°E (N. Sardinia),,,,,,,,
A,,,A,7,182,-16,,,251,4,57,186,,,,,,,,,,
B,,,B,8,121,-9,,,122,5,33,253,,,,,,,,,,
," Label: label of the mean direction; N: number of sites, D/ I: declination/inclination in situ, Dc/Ic: declination/inclination after tectonic correction, kc/kis: Fisher statistic k factor, corrected/in situ, a95%: confidence circle, Lat/Lon: latitude/longitude of the VGP, Latrot/Lonrot: latitude/longitude of the VGP rotated (Pole of rotation Corsica-Sardinia/Maures-Estérel: 42.7°N/8.8°E/-70°)",,,,,,,,,,,,,,,,,,,,,
,"Ref.1: reference of the palaeomagnetic data. Ref.2: reference of the ages. 1: Cozzupoli et al., 1971; 2: Lombardi et al., 1974; 3: Zijderveld, 1975; 4: Zijderveld et al., 1970; 5: Westphal, 1976; 6: Westphal et al., 1976; 7: Horner & Lowrie, 1979; 8: Edel, 1980; 9: Edel et al., 1981; 10: Begassat, 1985; 11: Merabet et Daly, 1986; 12: Baldelli et al., 1987; 13: Vigliotti et al., 1990; 14: Zheng et al., 1991; 15: Ménot et al., 1996; 16: Paquette et al., 2003; 17: Vlag et al., 1997; 18: Edel, 2000; 19: Gaggero et al., 2007; 20: Renna et al., 2007; 21: Van Tellingen, 1988; 22: Corsini et al., 2010; 23: Kircher et al., 2011, 24: Ayuso et al., 1994, 25: Manzoni, 1979, 26: Emmer et al., 2005; 27: Aubele et al., 2012; 28: Manzoni, unpublished; 29: Pares et al, 1988; 30: Edel, unpublished, 31: Solé et al., 1998; X: present study.",,,,,,,,,,,,,,,,,,,,,
